# Supplementary material for: Tal1NXtc01 in Xanthomonas translucens pv. cerealis Contributes to Virulence in Bacterial Leaf Streak of Wheat
Source: Front Microbiol. 2019 Sep 4;10:2040. doi: 10.3389/fmicb.2019.02040 (PMC6737349; doi:10.3389/fmicb.2019.02040)
Supplement: Supplementary file 1 [file Data_Sheet_1.docx]

Supplementary Material

Tal1NXtc01 in *Xanthomonas translucens* pv. *cerealis* Contributes to Virulence in Bacterial Leaf Streak of Wheat

Syed Mashab Ali Shah1, Fazal Haq1, Wenxiu Ma1, Xiameng Xu1, Sai Wang1, Zhengyin Xu1, Lifang Zou1,2, Bo Zhu1,2 and Gongyou Chen1,2*

1School of Agriculture and Biology, Shanghai Jiao Tong University/Key Laboratory of Urban Agriculture by the Ministry of Agriculture of China, Shanghai, 200240, China

2State Key Laboratory of Microbial Metabolism, School of Life Science and Biotechnology, Shanghai Jiao Tong University, Shanghai, 200240, China

*** Correspondence:** Gongyou Chen

[gyouchen@sjtu.edu.cn](mailto:gyouchen@sjtu.edu.cn)

**Running title:** Tal1NXtc01 contributes to virulence in *X. translucens* pv. *cerealis*

Supplementary Tables

Table S. Bacterial strains and plasmids used in this study.

| Strains and plasmids | | Relevant characteristics | Source |
| --- | --- | --- | --- |
| Strains | | | |
| *Xanthomonas translucens* pv. *cerealis* | | | |
| NXtc01 | Wild-type, isolated from *Triticum aestivum* in Xinjiang province, China, 2016 | | This study |
| Δ*tal1* | *tal1* knockout mutant of NXtc01 | | This study |
| Δ*tal2* | *tal2* knockout mutant of NXtc01 | | This study |
| TF | *tal* free mutant of NXtc01 | | This study |
| PHZW-*tal1* | Apr Spr, TF containing *tal1* *in trans* | | This study |
| PHZW-*tal2* | Apr Spr, TF containing *tal2* *in trans* | | This study |
| Δ*hrcC* | *hrcC* knockout mutant of NXtc01 | | This study |
| Δ*hrcC*/*hrcC* | Spr, *ΔhrcC* containing *hrcC* gene *in trans* | | This study |
| *Escherichia coli* | | |  |
| DH5α | F- *endA1*, *thi-1*, *recA1*, Φ80*lacZ*, ΔM15 | | This lab |
| Plasmids |  | |  |
| pKMS1 | Kmr, pUC18 polylinker, *mob*, *oriV*, *sacB* | | (Zou et al., 2011) |
| pB | Apr, pBluescript II phagemid, pUC derivative | | This lab |
| pHM1 | Spr, cosmid vector, *cos*, *parA*, *IncW* | | (Hopkins et al., 1992) |
| pZW | Apr, pBluescript II with FLAG-tag N- (831-bp) and C- (363-bp) terminus of *avrXa10.* Lacks the *Sph*I fragment containing the CRR; for expression of TAL effector genes | | (Yang et al., 2000) |
| pB-*tal1* | Apr, pB containing *tal1* at *Bam*HI site | | This study |
| pB-*tal2* | Apr, pB containing *tal2* at *Bam*HI site | | This study |
| pKMSTal1 | Kmr, pKMS1 containing sequences at the 5’ and 3’ end of *tal1*; used for generating *tal1* deletion mutant | | This study |
| pKMSTal2 | Kmr, pKMS1 containing sequences at the 5’ and 3’ end of *tal2*; used for generating *tal2* deletion mutant | | This study |
| pKMShrcC | Kmr, pKMS1 containing sequences at the 5’ and 3’ end of *hrcC*; used for generating *hrcC* deletion | | This study |
| pZW-*tal1* | Apr, CRR of *tal1* from *Sph*I digested pB-*tal1* were ligated into *Sph*I-linearized, CIP-treated pZW vector | | This study |
| pZW-*tal2* | Apr, CRR of *tal2* from *Sph*I digested pB-*tal2* were ligated into *Sph*I-linearized, CIP-treated pZW vector | | This study |
| pHZW-*tal1* | Apr Spr, pZW with *tal1* in pHM1 at *Hin*dIII site | | This study |
| pHZW-*tal2* | Apr Spr, pZW with *tal2* in pHM1 at *Hin*dIII site | | This study |
| pB-*hrcC* | Apr, pBluescript II, contains *hrcC* | | This study |
| pH1-Flag(-) | Spr, pHM1 containing MCS with FLAG-tag bacteriophage λ T0 and *E. coli* *rrnB* T1 terminators | | Yang Xiaofei, unpublished data |
| pH1-Flag(-)*hrcC* | Spr, pH1**-**Flag(-); contains *hrcC* at *Sal*I/*Kpn*I sites | | This study |

**Note**: Apr, ampicillin resistance; Kmr, kanamycin resistance; Spr, spectinomycin resistance.

Table S. Primers used in this study.

| Primers | Sequence 5’to 3’ | Description |
| --- | --- | --- |
| T1Nt-F | AACTGCAGTGGATGGCTTGCCCGCTC | Amplifies 640-bp fragment upstream of *tal1*; used for deletion mutagenesis |
| T1Nt-R | GCTCTAGAGCCTGTGACCAACTGTAACG |
| T1Ct-F | GCTCTAGAGCAAGCATTTGATGAAGCG | Amplifies 425-bp fragment downstream of *tal1*; used for deletion mutagenesis |
| T1Ct-R | TCCCCCGGGGCGTTTTACACCCCAGCTACT |
| T2Ct-F | TCCCCCGGGAGGCAATAGCGTCATCA | Amplifies 698-bp fragment upstream of *tal2*; used for deletion mutagenesis |
| T2Ct-R | GCTCTAGACACAAGAACCCGTAACCT |
| T2Nt-F | GCTCTAGAATTATTGCTGACGATGGC | Amplifies 413-bp fragment downstream of *tal2;* used for deletion mutagenesis |
| T2Nt-R | AACTGCAGGGAGAAGATCAAACCGAAG |
| *hrcC*-up-F | TCCCCCGGGGTGGTCAGGCAGGTATCG | Amplifies 610-bp fragment upstream of *hrcC;* used for deletion mutagenesis |
| *hrcC*-up-R | CGCGGATCCCCAACGCCACTGTCAAA |
| *hrcC*-do-F | CGCGGATCCCGGGATTGTCCAAGGTG | Amplifies 694-bp fragment downstream of *hrcC;* used for deletion mutagenesis |
| *hrcC*-do-R | CTAGTCTAGAGGAAACTTCGCTGCCTC |
| M13-R | AGCGGATAACAATTTCACACAGG | Universal primers used for confirmation and sequencing |
| M13-F | CGCCAGGGTTTTCCCAGTCACGAC |
| *hrcC*-F1 | ACGCGTCGACATGAAACAGCAACGTTCGC | Amplifies 1217-bp fragment beginning at the start codon of *hrcC;* used for complementation in pH1-Flag(-) |
| *hrcC*-R1 | TCCAGATGGCGGTTGTG |
| *hrcC*-F2 | CGCACCGTTCAGATGGA | Amplifies 1260- bp fragment extending from the middle of *hrcC* and ending before stop codon; used for complementation in pH1-Flag(-) |
| *hrcC*-R2 | CGGGGTACCGGGCGAGACCACGTGG |
| TALN18S-F | AGAGGCGACACACGAAGACA | Amplifies 255-bp fragment, used to confirm of *Sph*I-ligated *tal* gene orientation in pZW |
| TalN-R | CCGCCACTATTGCTGACGAT |

**Note**: Underlined bases indicate restriction enzyme sites.

**Table S3|**Predicted type III effectors in *X. translucens* pv. *cerealis* NXtc01 based on comparison with other *Xanthomonas* spp. included *X. translucens* pv. *cerealis* CFBP 2541, *X. translucens* pv. *undulosa* ICMP11055, *X. translucens* pv. *translucens* DSM 18974T, *X. campestris* pv. *campestris* 8004, *X. oryzae* pv. *oryzae* PX099A and *X. oryzae* pv. *oryzicola* BLS256.

| T3Es | NXtc01a | CFBP2541b | ICMP11055c | DSM18974Td | 8004e | PXO99Af | BLS256g |
| --- | --- | --- | --- | --- | --- | --- | --- |
| AvrBs1 | ND | + | ND | ND | + | ND | ND |
| AvrBs2 | ++ | ++ | ++ | ++ | + | + | + |
| TALEs | 2 | 2 | 7 | 8 | ND | 19 | 28 |
| AvrXccA1 | + | ND | ND | ND | + | ND | ND |
| XopAA | + | + | + | + | ND | + | + |
| XopAD | + | + | + | + | ND | + | + |
| XopAF1 | + | + | + | ++ | ND | ND | + |
| XopAH | ND | ND | + | + | + | + | + |
| XopAK | ND | ND | + | + | ND | ND | + |
| XopAM | + | + | + | + | + | ND | ND |
| XopAP | + | + | + | F | ND | ND | + |
| XopAZ | + | ND | ND | ND | + | + | + |
| T3Es | **NXtc01a** | **CFBP2541b** | **ICMP11055c** | **DSM18974Td** | **8004e** | **PXO99Af** | **BLS256g** |
| XopB | + | + | + | + | ND | ND | ND |
| XopC2 | + | + | + | + | ND | + | + |
| XopE1 | + | + | + | ND | ND | ND | ND |
| XopE2 | + | + | ND | + | + | ND | ND |
| XopE3 | ND | ND | ND | + | ND | ND | ND |
| XopE5 | + | + | + | ND | ND | ND | ND |
| XopF | ++ | ++ | ++ | ++ | + | + | + |
| XopG | + | + | + | + | ND | + | ND |
| XopJ | + | ND | ND | + | + | ND | ND |
| XopK | + | + | + | + | + | + | + |
| XopL | ++++ | ++++ | ++ | ++ | + | + | + |
| XopN | + | + | + | + | + | + | + |
| XopP | +++ | +++ | ++ | +++ | + | + | ++ |
| XopQ | + | + | + | + | + | + | + |
| T3Es | **NXtc01a** | **CFBP2541b** | **ICMP11055c** | **DSM18974Td** | **8004e** | **PXO99Af** | **BLS256g** |
| XopR | F | F | + | + | + | + | + |
| XopV | + | + | + | + | ND | + | + |
| XopX | +++ | +++ | +++ | +++ | ++ | + | + |
| XopY | + | + | + | + | ND | + | + |
| XopZ | + | + | + | + | + | ++ | + |

Abbreviations: The number of plus symbols indicates the copy number of T3Es in a given strain. ND, not detected; F, frameshift mutation.

a This study

b (Pesce et al., 2015)

c (Falahi Charkhabi et al., 2017)

d (Jaenicke et al., 2016)

e (Qian et al., 2005)

f (Salzberg et al., 2008)

g (Bogdanove et al., 2011)

**Table S4.** COG functional classifications and colors for Figure 1.

| **Single letter COG class** | **Functional description** | **Color in Figure 1** |
| --- | --- | --- |
| A | RNA processing and modification | Orange3 |
| B | Chromatin structure | Black |
| C | Energy production/conversion | RoyalBlue4 |
| D | Cell division/chromosome partitioning | AntiqueWhite1 |
| E | Amino acid transport/metabolism | DodgerBlue1 |
| F | Nucleotide transport/metabolism | SkyBlue3 |
| G | Carbohydrate transport/metabolism | Blue1 |
| H | Coenzyme transport/metabolism | LightBlue1 |
| I | Lipid transport/metabolism | Cyan3 |
| J | Translation/ribosomal structure | Gold1 |
| K | Transcription | DarkOrange1 |
| L | Replication/recombination/repair | DarkOrange3 |
| M | Cell wall/membrane/envelope biogenesis | PeachPuff3 |
| N | Cell motility | MediumPurple1 |
| O | Chaperones | PaleGreen1 |
| P | Inorganic ion metabolism | MediumPurple4 |
| Q | Secondary metabolite biosynthesis/transport/catabolism | Aquamarine4 |
| R | General function prediction | Gray90 |
| S | Function unknown | Gray70 |
| T | Signal transduction | Tomato1 |
| U | Intracellular trafficking/secretion | DeepPink |
| V | Defense mechanisms | Pink |
| W | Extracellular structures | Green |
| Y | Nuclear structure | Yellow |
| Z | Cytoskeleton | Red |
| None | No COG category | Gray50 |

Supplementary Figures


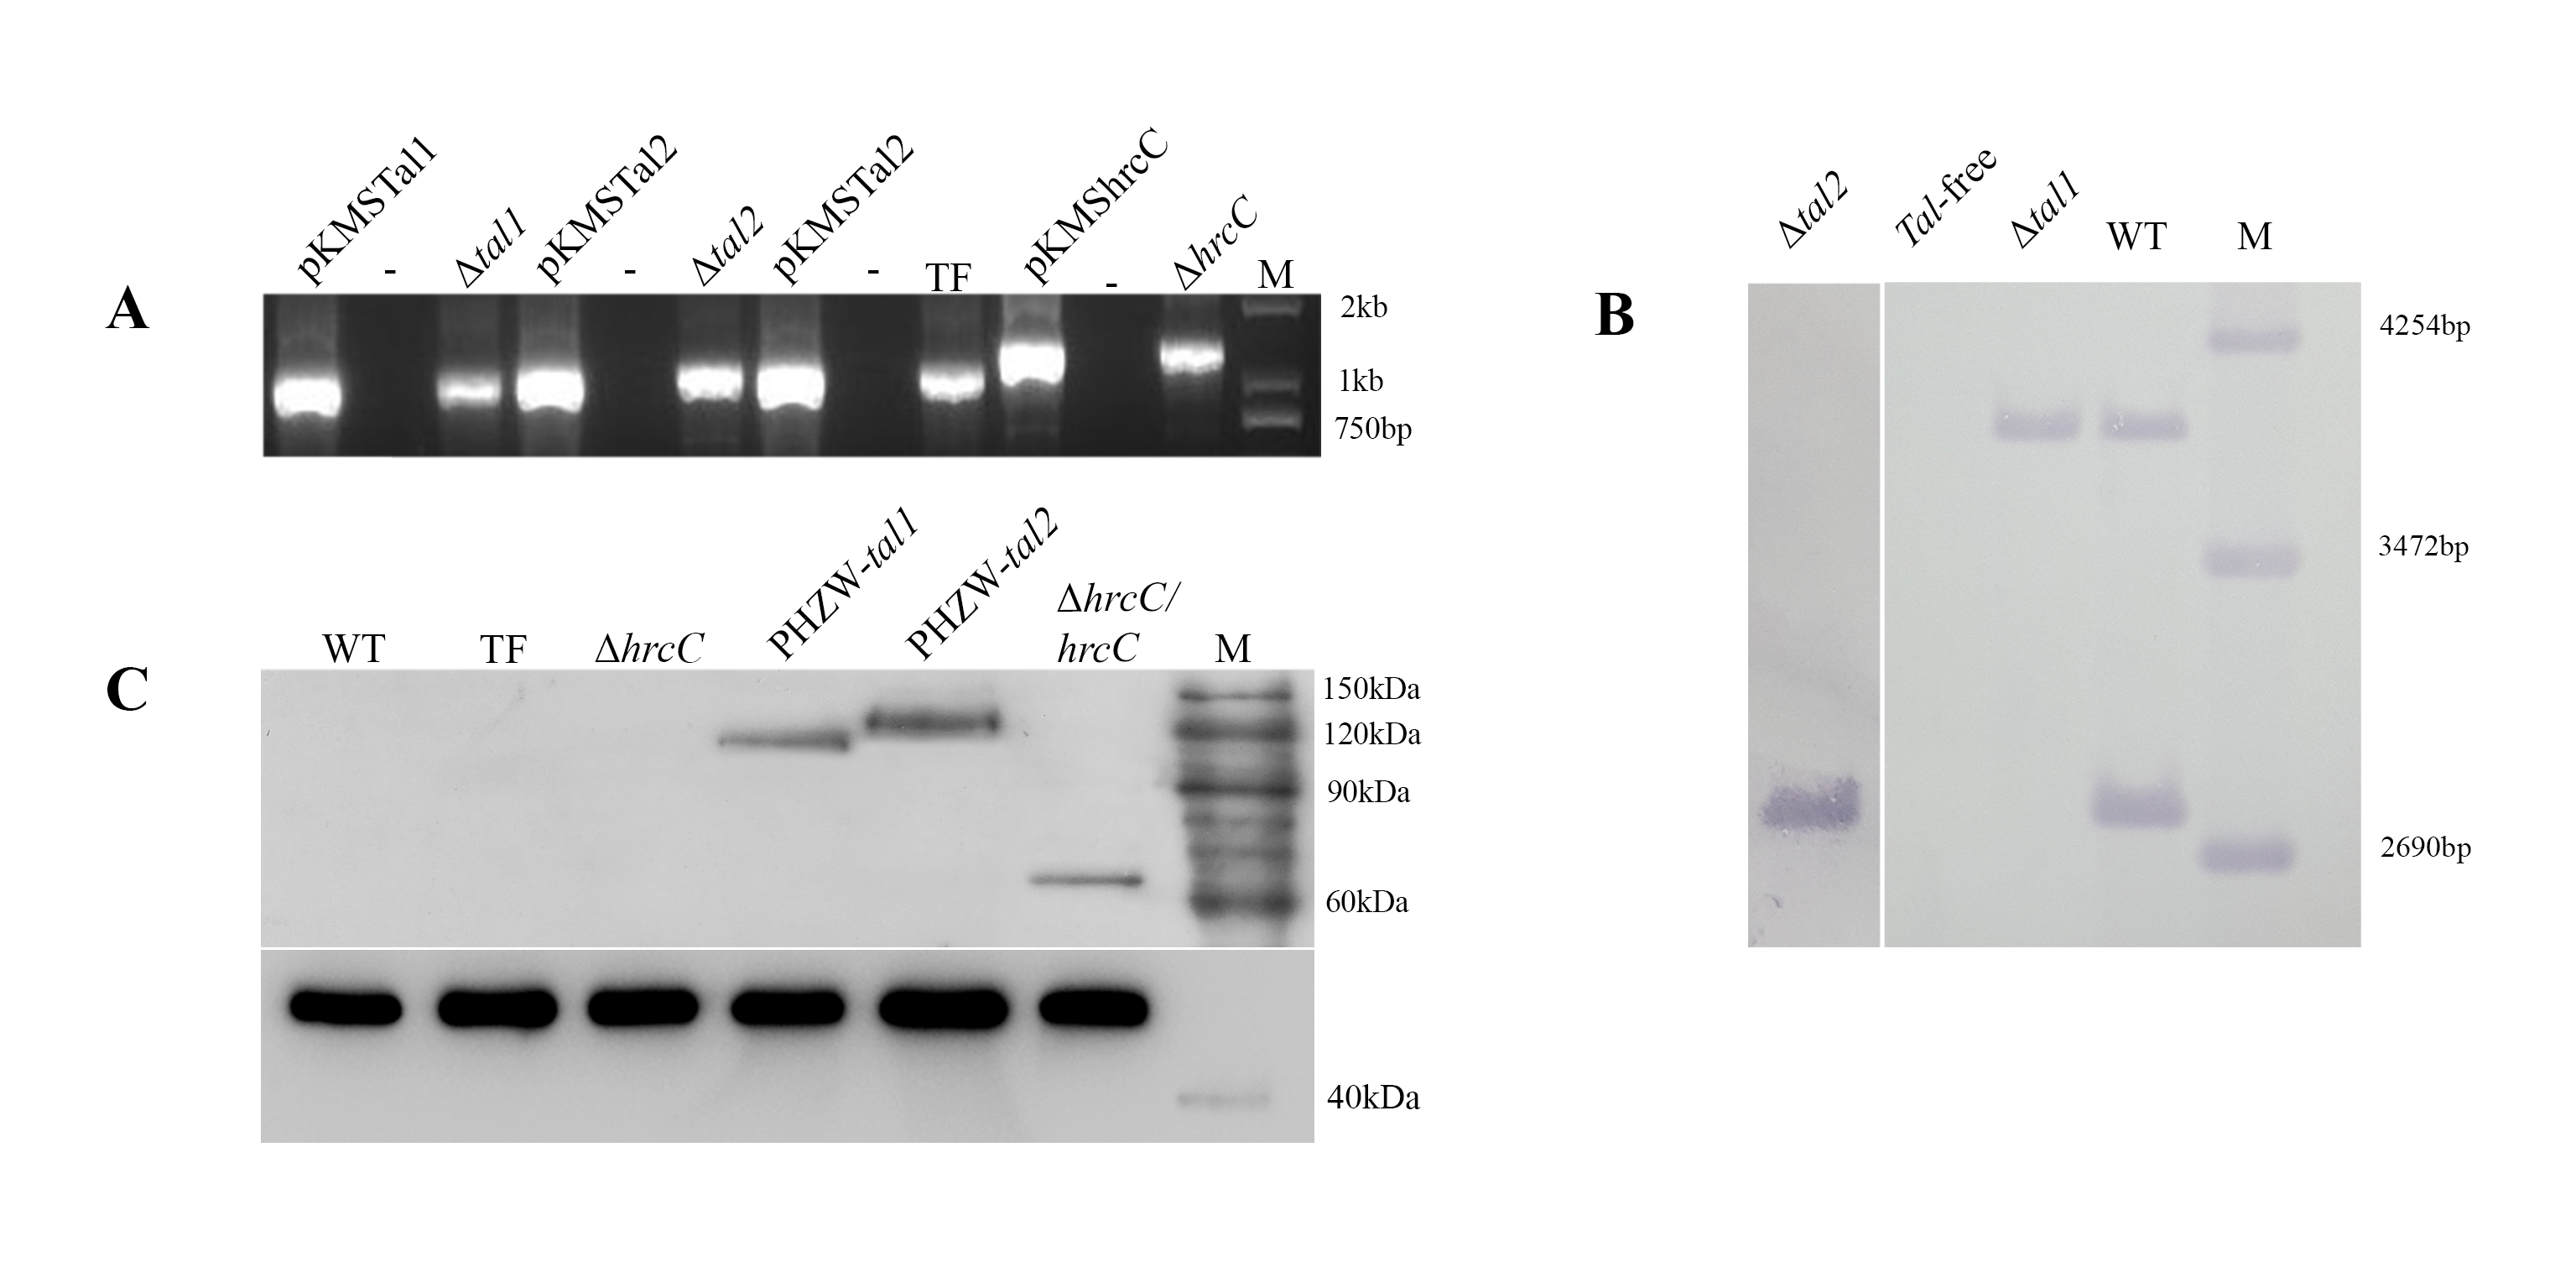


**Figure S1. Knockout and complementation analysis of *tal* and *hrcC* genes in NXtc01.** The *tal1*, *tal2*, *tal*-free and *hrcC* mutants were generated using suicide vector pKMS1. **(A)** Lanes show the constructs (pKMSTal1, pKMSTal2 and pKMShrcC) that were used as positive controls and mutants (Δ*tal1*, Δ*tal2*, TF and Δ*hrcC*) that were screened via PCR. Primers were as follows: T1Nt-F/T1Ct-R, amplifies a 1071-bp fragment; T2Ct-F/T2Nt-R, amplifies a 1124-bp fragment; and hrcC-up-F/hrcC-do-R, amplifies a 1317-bp fragment. **(B)** Southern blot of *Bam*HI-digested genomic DNA of WT and mutants, probed with a DIG-labeled *Sph*I fragment of the NXtc01 *tal1* gene. **(C)** Immunodetection of flag-tagged Tal1 (104.8 kDa) and Tal2 (119.3 kDa) in the *tal*-free mutant, and flag-tagged HrcC (66.8 kDa) in the Δ*hrcC* mutant. WT, *tal*-free and the Δ*hrcC* mutant were included as controls. Flag-tagged proteins were detected by autoradiography. An anti-E. coli RNA polymerase α antibody was used as loading control shown in lower panel. Marker sizes are indicated on the right side of each panel.

**Abbreviations:** M, marker; positive control, construct used for homologous recombination; (-) negative control, PCR without template DNA; WT, wild-type *Xtc* NXtc01; Δ*tal1*, NXtc01 *tal1* deletion mutant; Δ*tal2*, NXtc01 *tal2* deletion mutant; TF, NXtc01 *tal*-free mutant; PHZW-*tal1*, NXtc01 TF with *tal1* *in trans*; PHZW-*tal2*, NXtc01 TF with *tal2 in trans*; Δ*hrcC*, NXtc01 *hrcC* deletion mutant; and Δ*hrcC*/*hrcC*, NXtc01 Δ*hrcC* containing *hrcC in trans*.


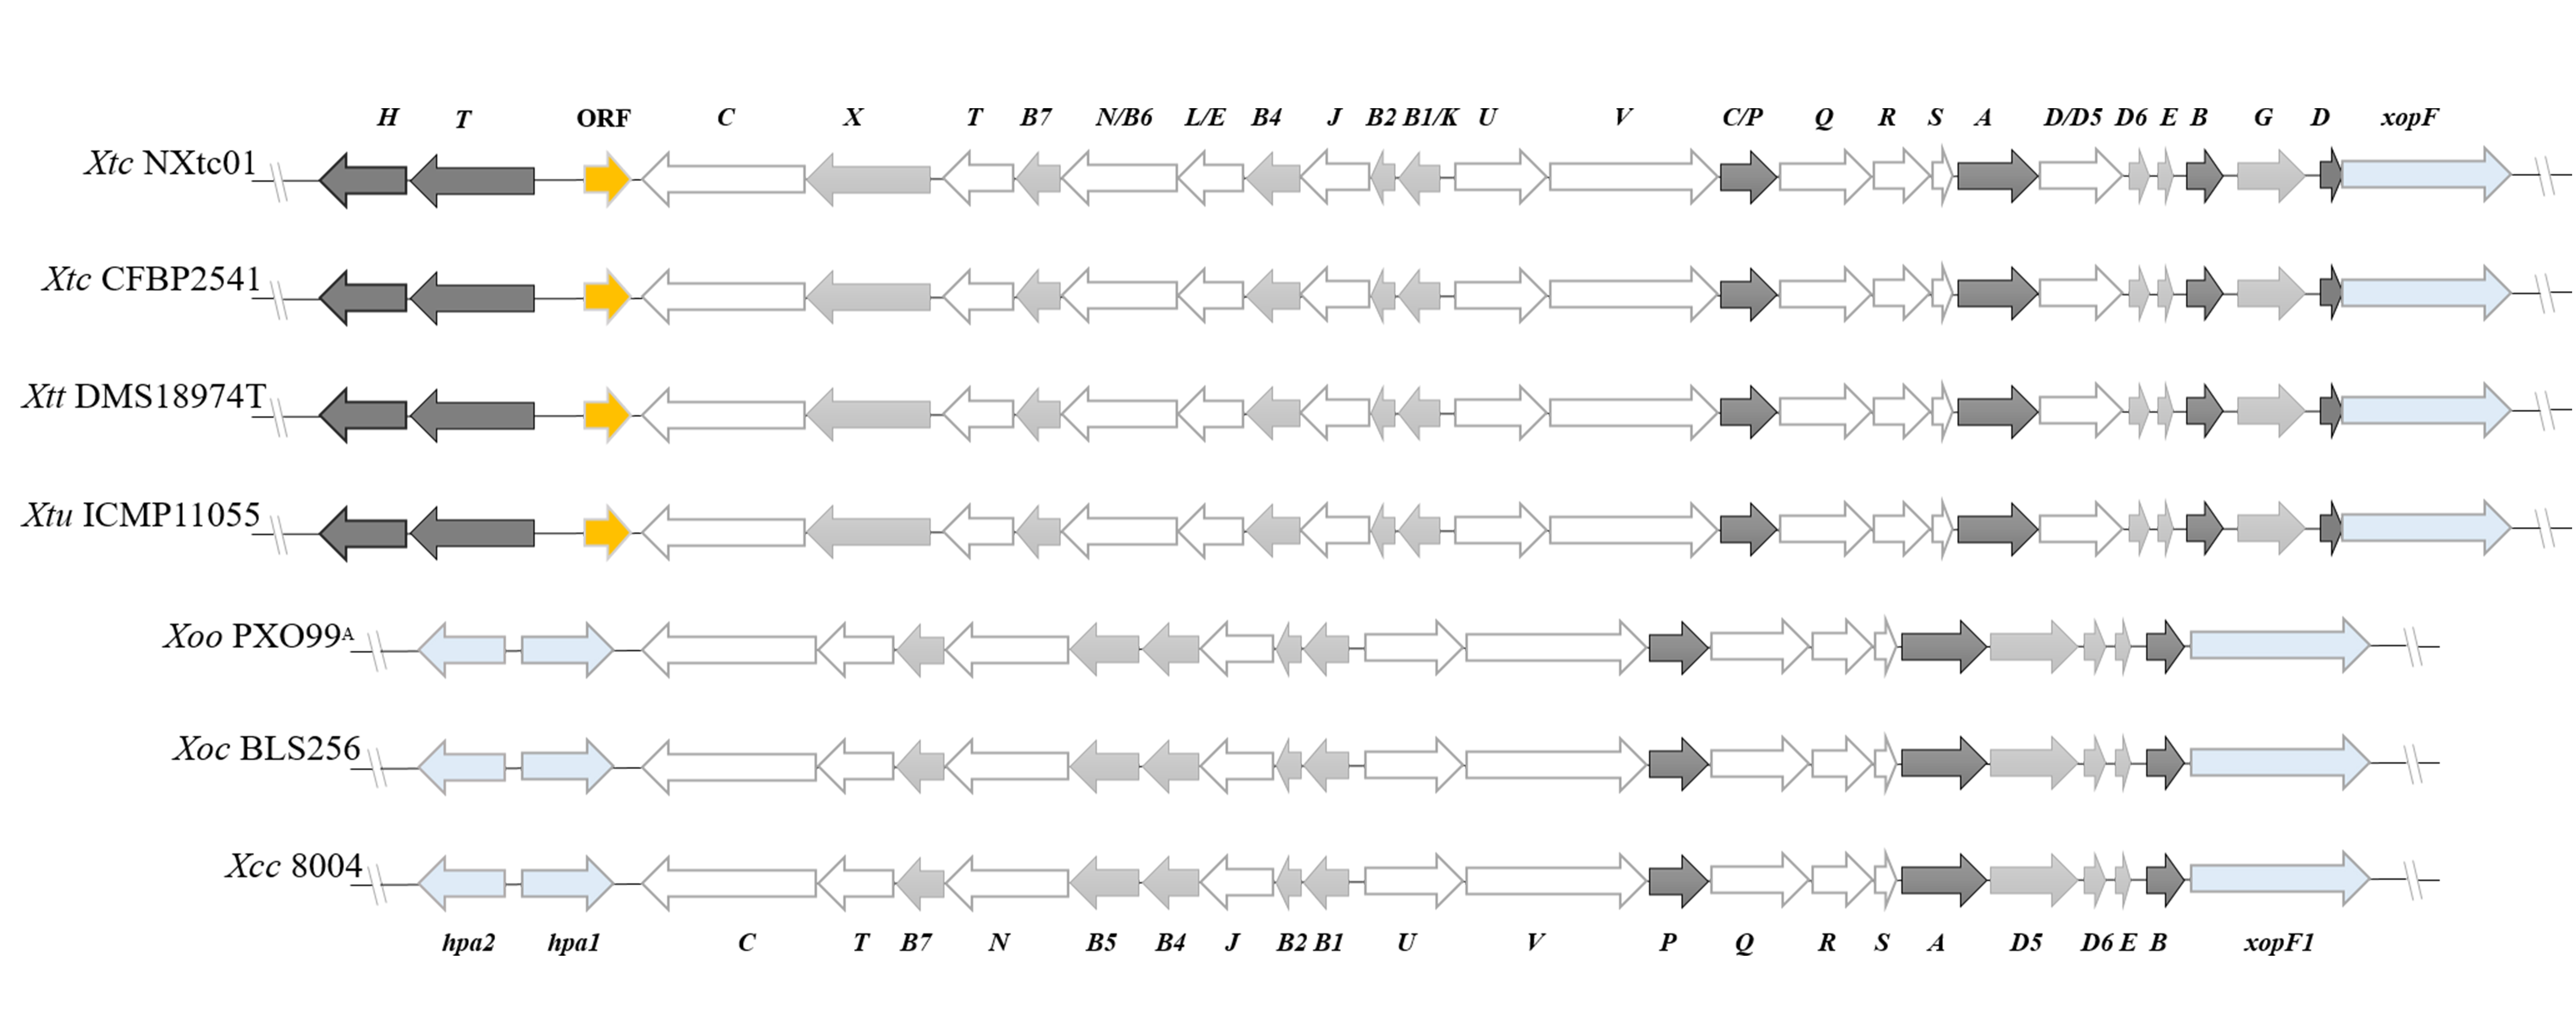


**Figure S2.** Comparison of the T3SS gene clusters in *X. translucens* pv. *cerealis* Nxtc01, *X. translucens* pv. *cerealis* CFBP 2541 (Pesce et al., 2015)*,* *X. translucens* pv. *undulosa* ICMP11055 (Falahi Charkhabi et al., 2017), *X. translucens* pv. *translucens* DSM 18974T (Jaenicke et al., 2016), *X. campestris* pv. *campestris* 8004 (Qian et al., 2005), *X. oryzae* pv. *oryzae* PX099A (Salzberg et al., 2008) and *X. oryzae* pv. *oryzicola* BLS256 (Bogdanove et al., 2011). The *hrc*, *hrp*, *hpa*, T3Es and hypothetical genes are represented by white, light gray, dark gray, light blue and gold arrows, respectively; arrowheads show the transcriptional orientation. Distance between operons are not drawn to scale.

**REFERENCES**

Bogdanove, A.J., Koebnik, R., Lu, H., Furutani, A., Angiuoli, S.V., Patil, P.B., et al. (2011). Two new complete genome sequences offer insight into host and tissue specificity of plant pathogenic *Xanthomonas* spp. *Journal of bacteriology***,** JB. 05262-05211.

Falahi Charkhabi, N., Booher, N.J., Peng, Z., Wang, L., Rahimian, H., Shams-Bakhsh, M., et al. (2017). Complete genome sequencing and targeted mutagenesis reveal virulence contributions of Tal2 and Tal4b of *Xanthomonas translucens* pv. *undulosa* ICMP11055 in bacterial leaf streak of wheat. *Frontiers in microbiology* 8**,** 1488.

Hopkins, C.M., White, F., Choi, S., Guo, A., and Leach, J. (1992). Identification of a family of avirulence genes from Xanthomonas oryzae pv. oryzae. *Mol Plant Microbe Interact* 5(6)**,** 451-459.

Jaenicke, S., Bunk, B., Wibberg, D., Spröer, C., Hersemann, L., Blom, J., et al. (2016). Complete genome sequence of the barley pathogen *Xanthomonas translucens* pv. *translucens* DSM 18974T (ATCC 19319T). *Genome announcements* 4(6)**,** e01334-01316.

Pesce, C., Bolot, S., Cunnac, S., Portier, P., Fischer-Le Saux, M., Jacques, M.-A., et al. (2015). High-quality draft genome sequence of the *Xanthomonas translucens* pv. *cerealis* pathotype strain CFBP 2541. *Genome announcements* 3(1)**,** e01574-01514.

Qian, W., Jia, Y., Ren, S.-X., He, Y.-Q., Feng, J.-X., Lu, L.-F., et al. (2005). Comparative and functional genomic analyses of the pathogenicity of phytopathogen *Xanthomonas campestris* pv. *campestris*. *Genome research* 15(6)**,** 757-767.

Salzberg, S.L., Sommer, D.D., Schatz, M.C., Phillippy, A.M., Rabinowicz, P.D., Tsuge, S., et al. (2008). Genome sequence and rapid evolution of the rice pathogen *Xanthomonas oryzae* pv. *oryzae* PXO99A. *BMC genomics* 9(1)**,** 204.

Yang, B., Zhu, W., Johnson, L.B., and White, F.F. (2000). The virulence factor AvrXa7 of *Xanthomonas oryzae* pv. *oryzae* is a type III secretion pathway-dependent nuclear-localized double-stranded DNA-binding protein. *Proceedings of the National Academy of Sciences* 97(17)**,** 9807-9812.

Zou, L.-F., Li, Y.-R., and Chen, G.-Y. (2011). A non-marker mutagenesis strategy to generate poly-*hrp* gene mutants in the rice pathogen *Xanthomonas oryzae* pv. *oryzicola*. *Agricultural Sciences in China* 10(8)**,** 1139-1150.
